# Supplementary material
Source: publisher figshare collection journal article supplement (https://f1000.figshare.com/articles/dataset/_/106723)
Supplement: Supplementary file 1 [file 1]

[illegible]

|   | Group C |       |       |       |       |       |       |       |       |
|---|---------|-------|-------|-------|-------|-------|-------|-------|-------|
|   | XY24TL  |       |       |       |       |       |       |       |       |
|   | C:Y2    | C:Y3  | C:Y4  | C:Y5  | C:Y6  | C:Y7  | C:Y8  | D:Y1  | D:Y2  |
| 1 | 98.0    | 105.0 | 88.0  | 94.0  | 102.0 | 94.0  | 102.0 | 93.0  | 100.0 |
| 2 | 99.0    | 93.0  | 89.0  | 84.0  | 103.0 | 84.0  | 103.0 | 84.0  | 109.0 |
| 3 | 134.0   | 116.0 | 121.0 | 104.0 | 140.0 | 104.0 | 140.0 | 123.0 | 110.0 |
| 4 | 98.0    | 131.0 | 88.0  | 118.0 | 102.0 | 118.0 | 102.0 | 129.0 | 110.0 |
| 5 | 132.0   | 168.0 | 119.0 | 152.0 | 138.0 | 152.0 | 138.0 | 150.0 | 164.0 |
| 6 | 119.0   | 152.0 | 107.0 | 138.0 | 124.0 | 138.0 | 124.0 | 110.0 | 166.0 |
| 7 | 138.0   | 139.0 | 125.0 | 125.0 | 144.0 | 125.0 | 144.0 | 159.0 | 148.0 |
| 8 | 119.0   | 160.0 | 107.0 | 145.0 | 124.0 | 145.0 | 124.0 | 109.0 | 130.0 |

|   | Group D |       |       |       |       |       |       |       |       |
|---|---------|-------|-------|-------|-------|-------|-------|-------|-------|
|   | XY27FD  |       |       |       |       |       |       |       |       |
|   | D:Y3    | D:Y4  | D:Y5  | D:Y6  | D:Y7  | D:Y8  | E:Y1  | E:Y2  | E:Y3  |
| 1 | 108.0   | 90.0  | 125.0 | 80.0  | 113.0 | 94.0  | 96.0  | 88.0  | 111.0 |
| 2 | 98.0    | 98.0  | 114.0 | 88.0  | 102.0 | 102.0 | 99.0  | 87.0  | 115.0 |
| 3 | 142.0   | 99.0  | 163.0 | 89.0  | 148.0 | 103.0 | 96.0  | 119.0 | 111.0 |
| 4 | 149.0   | 99.0  | 171.0 | 89.0  | 155.0 | 103.0 | 99.0  | 118.0 | 115.0 |
| 5 | 173.0   | 148.0 | 198.0 | 134.0 | 180.0 | 155.0 | 142.0 | 173.0 | 163.0 |
| 6 | 127.0   | 150.0 | 147.0 | 136.0 | 133.0 | 157.0 | 143.0 | 109.0 | 165.0 |
| 7 | 183.0   | 134.0 | 209.0 | 121.0 | 190.0 | 139.0 | 109.0 | 122.0 | 126.0 |
| 8 | 126.0   | 117.0 | 146.0 | 106.0 | 132.0 | 122.0 | 142.0 | 109.0 | 163.0 |

|   | Group E |       |       |       |       | Group  |       |       |       |
|---|---------|-------|-------|-------|-------|--------|-------|-------|-------|
|   | HIDEM 1 |       |       |       |       | LGMD2D |       |       |       |
|   | E:Y4    | E:Y5  | E:Y6  | E:Y7  | E:Y8  | F:Y1   | F:Y2  | F:Y3  | F:Y4  |
| 1 | 79.0    | 129.0 | 70.0  | 116.0 | 82.0  | 89.0   | 90.0  | 104.0 | 81.0  |
| 2 | 78.0    | 133.0 | 69.0  | 120.0 | 81.0  | 88.0   | 108.0 | 102.0 | 97.0  |
| 3 | 107.0   | 129.0 | 96.0  | 116.0 | 112.0 | 99.0   | 90.0  | 115.0 | 81.0  |
| 4 | 106.0   | 133.0 | 95.0  | 120.0 | 111.0 | 108.0  | 120.0 | 125.0 | 108.0 |
| 5 | 157.0   | 188.0 | 142.0 | 170.0 | 163.0 | 183.0  | 133.0 | 210.0 | 120.0 |
| 6 | 98.0    | 189.0 | 88.0  | 171.0 | 102.0 | 123.0  | 112.0 | 142.0 | 101.0 |
| 7 | 110.0   | 146.0 | 99.0  | 132.0 | 115.0 | 157.0  | 134.0 | 180.0 | 121.0 |
| 8 | 98.0    | 188.0 | 88.0  | 170.0 | 102.0 | 150.0  | 119.0 | 173.0 | 107.0 |

|             |       |       |       |       |
|-------------|-------|-------|-------|-------|
| Group F     |       |       |       |       |
| LGMD2D Pt.3 |       |       |       |       |
|             | F:Y5  | F:Y6  | F:Y7  | F:Y8  |
| 1           | 120.0 | 72.0  | 108.0 | 84.0  |
| 2           | 119.0 | 87.0  | 107.0 | 101.0 |
| 3           | 133.0 | 72.0  | 120.0 | 84.0  |
| 4           | 144.0 | 97.0  | 130.0 | 113.0 |
| 5           | 240.0 | 108.0 | 218.0 | 125.0 |
| 6           | 163.0 | 90.0  | 148.0 | 105.0 |
| 7           | 207.0 | 109.0 | 188.0 | 126.0 |
| 8           | 198.0 | 96.0  | 180.0 | 112.0 |
