# Supplementary material
Source: publisher figshare collection journal article supplement (https://f1000.figshare.com/articles/dataset/_/106723)
Supplement: Supplementary file 4 [file 1]

[illegible]

|   | Group C |       |       |       |       |       |       |       |       |
|---|---------|-------|-------|-------|-------|-------|-------|-------|-------|
|   | XY24TL  |       |       |       |       |       |       |       |       |
|   | C:Y2    | C:Y3  | C:Y4  | C:Y5  | C:Y6  | C:Y7  | C:Y8  | D:Y1  | D:Y2  |
| 1 | 98.0    | 116.0 | 88.0  | 134.0 | 79.0  | 121.0 | 92.0  | 110.0 | 98.0  |
| 2 | 309.0   | 432.0 | 281.0 | 492.0 | 256.0 | 449.0 | 293.0 | 366.0 | 309.0 |
| 3 | 89.0    | 126.0 | 80.0  | 146.0 | 71.0  | 132.0 | 83.0  | 110.0 | 89.0  |
| 4 | 97.0    | 105.0 | 87.0  | 121.0 | 78.0  | 109.0 | 91.0  | 85.0  | 97.0  |
| 5 | 455.0   | 431.0 | 415.0 | 490.0 | 379.0 | 448.0 | 431.0 | 288.0 | 455.0 |
| 6 | 311.0   | 352.0 | 283.0 | 401.0 | 258.0 | 366.0 | 294.0 | 288.0 | 311.0 |
| 7 | 89.0    | 115.0 | 80.0  | 133.0 | 71.0  | 120.0 | 83.0  | 110.0 | 89.0  |
| 8 | 281.0   | 393.0 | 256.0 | 447.0 | 233.0 | 408.0 | 266.0 | 365.0 | 281.0 |

|   | Group D |       |       |       |       |       |       |       |       |
|---|---------|-------|-------|-------|-------|-------|-------|-------|-------|
|   | XY27FD  |       |       |       |       |       |       |       |       |
|   | D:Y3    | D:Y4  | D:Y5  | D:Y6  | D:Y7  | D:Y8  | E:Y1  | E:Y2  | E:Y3  |
| 1 | 127.0   | 88.0  | 147.0 | 79.0  | 133.0 | 92.0  | 110.0 | 98.0  | 127.0 |
| 2 | 417.0   | 281.0 | 474.0 | 256.0 | 433.0 | 293.0 | 366.0 | 309.0 | 417.0 |
| 3 | 127.0   | 80.0  | 147.0 | 71.0  | 133.0 | 83.0  | 110.0 | 89.0  | 127.0 |
| 4 | 99.0    | 87.0  | 115.0 | 78.0  | 103.0 | 91.0  | 85.0  | 97.0  | 99.0  |
| 5 | 328.0   | 415.0 | 374.0 | 379.0 | 341.0 | 431.0 | 288.0 | 455.0 | 328.0 |
| 6 | 328.0   | 283.0 | 374.0 | 258.0 | 341.0 | 294.0 | 288.0 | 311.0 | 328.0 |
| 7 | 127.0   | 80.0  | 147.0 | 71.0  | 133.0 | 83.0  | 110.0 | 89.0  | 127.0 |
| 8 | 415.0   | 256.0 | 472.0 | 233.0 | 431.0 | 266.0 | 365.0 | 281.0 | 415.0 |

|   | Group E |       |       |       |       | Group  |       |       |       |
|---|---------|-------|-------|-------|-------|--------|-------|-------|-------|
|   | HIDEM 1 |       |       |       |       | LGMD2D |       |       |       |
|   | E:Y4    | E:Y5  | E:Y6  | E:Y7  | E:Y8  | F:Y1   | F:Y2  | F:Y3  | F:Y4  |
| 1 | 88.0    | 147.0 | 79.0  | 133.0 | 92.0  | 110.0  | 109.0 | 127.0 | 98.0  |
| 2 | 281.0   | 474.0 | 256.0 | 433.0 | 293.0 | 366.0  | 294.0 | 417.0 | 268.0 |
| 3 | 80.0    | 147.0 | 71.0  | 133.0 | 83.0  | 110.0  | 90.0  | 127.0 | 81.0  |
| 4 | 87.0    | 115.0 | 78.0  | 103.0 | 91.0  | 85.0   | 90.0  | 99.0  | 81.0  |
| 5 | 415.0   | 374.0 | 379.0 | 341.0 | 431.0 | 288.0  | 330.0 | 328.0 | 301.0 |
| 6 | 283.0   | 374.0 | 258.0 | 341.0 | 294.0 | 288.0  | 324.0 | 328.0 | 295.0 |
| 7 | 80.0    | 147.0 | 71.0  | 133.0 | 83.0  | 110.0  | 109.0 | 127.0 | 98.0  |
| 8 | 256.0   | 472.0 | 233.0 | 431.0 | 266.0 | 365.0  | 220.0 | 415.0 | 200.0 |

|                |             |             |             |             |
|----------------|-------------|-------------|-------------|-------------|
| <b>Group F</b> |             |             |             |             |
| LGMD2D Pt.3    |             |             |             |             |
|                | <b>F:Y5</b> | <b>F:Y6</b> | <b>F:Y7</b> | <b>F:Y8</b> |
| <b>1</b>       | 147.0       | 88.0        | 133.0       | 102.0       |
| <b>2</b>       | 474.0       | 244.0       | 433.0       | 278.0       |
| <b>3</b>       | 147.0       | 72.0        | 133.0       | 84.0        |
| <b>4</b>       | 115.0       | 72.0        | 103.0       | 84.0        |
| <b>5</b>       | 374.0       | 274.0       | 341.0       | 313.0       |
| <b>6</b>       | 374.0       | 269.0       | 341.0       | 307.0       |
| <b>7</b>       | 147.0       | 88.0        | 133.0       | 102.0       |
| <b>8</b>       | 472.0       | 181.0       | 431.0       | 208.0       |
