# Supplementary material
Source: publisher figshare collection journal article supplement (https://f1000.figshare.com/articles/dataset/_/106723)
Supplement: Supplementary file 5 [file 1]

[illegible]

|   | Group C |       |       |       |       |       |       |       |       |
|---|---------|-------|-------|-------|-------|-------|-------|-------|-------|
|   | XY24TL  |       |       |       |       |       |       |       |       |
|   | C:Y2    | C:Y3  | C:Y4  | C:Y5  | C:Y6  | C:Y7  | C:Y8  | D:Y1  | D:Y2  |
| 1 | 189.0   | 229.0 | 171.0 | 262.0 | 155.0 | 238.0 | 178.0 | 210.0 | 177.0 |
| 2 | 270.0   | 432.0 | 246.0 | 492.0 | 223.0 | 449.0 | 255.0 | 366.0 | 324.0 |
| 3 | 189.0   | 191.0 | 171.0 | 218.0 | 155.0 | 198.0 | 178.0 | 210.0 | 177.0 |
| 4 | 155.0   | 170.0 | 140.0 | 195.0 | 127.0 | 177.0 | 146.0 | 185.0 | 179.0 |
| 5 | 300.0   | 431.0 | 273.0 | 490.0 | 249.0 | 448.0 | 284.0 | 288.0 | 290.0 |
| 6 | 267.0   | 229.0 | 243.0 | 262.0 | 221.0 | 238.0 | 253.0 | 210.0 | 277.0 |
| 7 | 222.0   | 229.0 | 202.0 | 262.0 | 183.0 | 238.0 | 210.0 | 210.0 | 256.0 |
| 8 | 218.0   | 229.0 | 198.0 | 262.0 | 180.0 | 238.0 | 206.0 | 270.0 | 234.0 |

|   | Group D |       |       |       |       |       |       |       |       |
|---|---------|-------|-------|-------|-------|-------|-------|-------|-------|
|   | XY27FD  |       |       |       |       |       |       |       |       |
|   | D:Y3    | D:Y4  | D:Y5  | D:Y6  | D:Y7  | D:Y8  | E:Y1  | E:Y2  | E:Y3  |
| 1 | 240.0   | 160.0 | 275.0 | 145.0 | 250.0 | 167.0 | 190.0 | 209.0 | 218.0 |
| 2 | 417.0   | 295.0 | 474.0 | 269.0 | 433.0 | 307.0 | 320.0 | 294.0 | 365.0 |
| 3 | 240.0   | 160.0 | 275.0 | 145.0 | 250.0 | 167.0 | 190.0 | 170.0 | 218.0 |
| 4 | 212.0   | 162.0 | 243.0 | 147.0 | 221.0 | 169.0 | 152.0 | 160.0 | 175.0 |
| 5 | 328.0   | 264.0 | 374.0 | 240.0 | 341.0 | 274.0 | 302.0 | 279.0 | 344.0 |
| 6 | 240.0   | 252.0 | 275.0 | 229.0 | 250.0 | 262.0 | 190.0 | 209.0 | 218.0 |
| 7 | 240.0   | 233.0 | 275.0 | 212.0 | 250.0 | 242.0 | 190.0 | 209.0 | 218.0 |
| 8 | 308.0   | 213.0 | 351.0 | 193.0 | 320.0 | 221.0 | 240.0 | 229.0 | 274.0 |

|   | Group E |       |       |       |       | Group  |       |       |       |
|---|---------|-------|-------|-------|-------|--------|-------|-------|-------|
|   | HIDEM 1 |       |       |       |       | LGMD2D |       |       |       |
|   | E:Y4    | E:Y5  | E:Y6  | E:Y7  | E:Y8  | F:Y1   | F:Y2  | F:Y3  | F:Y4  |
| 1 | 190.0   | 249.0 | 172.0 | 226.0 | 197.0 | 197.0  | 206.0 | 226.0 | 187.0 |
| 2 | 268.0   | 415.0 | 244.0 | 379.0 | 278.0 | 288.0  | 290.0 | 328.0 | 264.0 |
| 3 | 154.0   | 249.0 | 139.0 | 226.0 | 160.0 | 197.0  | 206.0 | 226.0 | 187.0 |
| 4 | 145.0   | 200.0 | 131.0 | 182.0 | 151.0 | 170.0  | 189.0 | 195.0 | 171.0 |
| 5 | 254.0   | 392.0 | 231.0 | 358.0 | 264.0 | 340.0  | 287.0 | 387.0 | 261.0 |
| 6 | 190.0   | 249.0 | 172.0 | 226.0 | 197.0 | 297.0  | 206.0 | 339.0 | 187.0 |
| 7 | 190.0   | 249.0 | 172.0 | 226.0 | 197.0 | 197.0  | 206.0 | 226.0 | 187.0 |
| 8 | 208.0   | 313.0 | 189.0 | 285.0 | 216.0 | 255.0  | 226.0 | 291.0 | 205.0 |

| Group F     |      |       |       |       |       |
|-------------|------|-------|-------|-------|-------|
| LGMD2D Pt.3 |      |       |       |       |       |
|             | F:Y5 | F:Y6  | F:Y7  | F:Y8  |       |
|             | 1    | 258.0 | 170.0 | 235.0 | 195.0 |
|             | 2    | 374.0 | 240.0 | 341.0 | 274.0 |
|             | 3    | 258.0 | 170.0 | 235.0 | 195.0 |
|             | 4    | 223.0 | 155.0 | 203.0 | 178.0 |
|             | 5    | 441.0 | 238.0 | 402.0 | 272.0 |
|             | 6    | 386.0 | 170.0 | 352.0 | 195.0 |
|             | 7    | 258.0 | 170.0 | 235.0 | 195.0 |
|             | 8    | 332.0 | 186.0 | 303.0 | 214.0 |
