# Supplementary material
Source: publisher figshare collection journal article supplement (https://f1000.figshare.com/articles/dataset/_/106723)
Supplement: Supplementary file 7 [file 1]

[illegible]

|   | Group C |        |        |        |        |        |        |        |        |
|---|---------|--------|--------|--------|--------|--------|--------|--------|--------|
|   | XY24TL  |        |        |        |        |        |        |        |        |
|   | C:Y2    | C:Y3   | C:Y4   | C:Y5   | C:Y6   | C:Y7   | C:Y8   | D:Y1   | D:Y2   |
| 1 | 980.0   | 1133.0 | 897.0  | 1283.0 | 821.0  | 1175.0 | 931.0  | 930.0  | 1100.0 |
| 2 | 1700.0  | 2037.0 | 1558.0 | 2305.0 | 1427.0 | 2113.0 | 1616.0 | 1900.0 | 1799.0 |
| 3 | 980.0   | 1133.0 | 897.0  | 1283.0 | 821.0  | 1175.0 | 931.0  | 736.0  | 1100.0 |
| 4 | 980.0   | 834.0  | 897.0  | 945.0  | 821.0  | 865.0  | 931.0  | 930.0  | 893.0  |
| 5 | 1782.0  | 1626.0 | 1633.0 | 1840.0 | 1496.0 | 1686.0 | 1694.0 | 1837.0 | 1648.0 |
| 6 | 980.0   | 1497.0 | 897.0  | 1694.0 | 821.0  | 1553.0 | 931.0  | 900.0  | 1660.0 |
| 7 | 980.0   | 1133.0 | 897.0  | 1283.0 | 821.0  | 1175.0 | 931.0  | 930.0  | 1100.0 |
| 8 | 1193.0  | 1133.0 | 1092.0 | 1283.0 | 1000.0 | 1175.0 | 1133.0 | 930.0  | 1100.0 |

|   | Group D |        |        |        |        |        |        |        |        |
|---|---------|--------|--------|--------|--------|--------|--------|--------|--------|
|   | XY27FD  |        |        |        |        |        |        |        |        |
|   | D:Y3    | D:Y4   | D:Y5   | D:Y6   | D:Y7   | D:Y8   | E:Y1   | E:Y2   | E:Y3   |
| 1 | 1054.0  | 1007.0 | 1194.0 | 922.0  | 1093.0 | 1045.0 | 960.0  | 980.0  | 1088.0 |
| 2 | 2150.0  | 1648.0 | 2433.0 | 1510.0 | 2230.0 | 1710.0 | 1798.0 | 1965.0 | 2035.0 |
| 3 | 835.0   | 1007.0 | 946.0  | 922.0  | 866.0  | 1045.0 | 960.0  | 872.0  | 1088.0 |
| 4 | 1054.0  | 817.0  | 1194.0 | 748.0  | 1093.0 | 848.0  | 789.0  | 980.0  | 895.0  |
| 5 | 2079.0  | 1510.0 | 2352.0 | 1383.0 | 2156.0 | 1566.0 | 1927.0 | 1739.0 | 2181.0 |
| 6 | 1020.0  | 1521.0 | 1156.0 | 1393.0 | 1058.0 | 1577.0 | 1431.0 | 899.0  | 1620.0 |
| 7 | 1054.0  | 1007.0 | 1194.0 | 922.0  | 1093.0 | 1045.0 | 960.0  | 725.0  | 1088.0 |
| 8 | 1054.0  | 1007.0 | 1194.0 | 922.0  | 1093.0 | 1045.0 | 1421.0 | 980.0  | 1609.0 |

| Group E |        |        |        |        |        | Group           |        |        |        |
|---------|--------|--------|--------|--------|--------|-----------------|--------|--------|--------|
| HIDEM 1 |        |        |        |        |        | LGMD2D<br>HIDEM |        |        |        |
|         | E:Y4   | E:Y5   | E:Y6   | E:Y7   | E:Y8   | F:Y1            | F:Y2   | F:Y3   | F:Y4   |
| 1       | 897.0  | 1232.0 | 821.0  | 1128.0 | 931.0  | 990.0           | 900.0  | 1122.0 | 824.0  |
| 2       | 1801.0 | 2302.0 | 1650.0 | 2110.0 | 1868.0 | 1888.0          | 1682.0 | 2136.0 | 1541.0 |
| 3       | 798.0  | 1232.0 | 730.0  | 1128.0 | 828.0  | 990.0           | 900.0  | 1122.0 | 824.0  |
| 4       | 897.0  | 1014.0 | 821.0  | 928.0  | 931.0  | 788.0           | 900.0  | 893.0  | 824.0  |
| 5       | 1593.0 | 2467.0 | 1460.0 | 2261.0 | 1653.0 | 1836.0          | 1638.0 | 2078.0 | 1501.0 |
| 6       | 823.0  | 1834.0 | 753.0  | 1680.0 | 854.0  | 990.0           | 1123.0 | 1122.0 | 1028.0 |
| 7       | 663.0  | 1232.0 | 606.0  | 1128.0 | 688.0  | 990.0           | 900.0  | 1122.0 | 824.0  |
| 8       | 897.0  | 1821.0 | 821.0  | 1669.0 | 931.0  | 1200.0          | 900.0  | 1359.0 | 824.0  |

| Group F               |        |        |        |        |
|-----------------------|--------|--------|--------|--------|
| LGMD2D Pt.3<br>HIDEMs |        |        |        |        |
|                       | F:Y5   | F:Y6   | F:Y7   | F:Y8   |
| 1                     | 1271.0 | 754.0  | 1164.0 | 855.0  |
| 2                     | 2417.0 | 1412.0 | 2216.0 | 1598.0 |
| 3                     | 1271.0 | 754.0  | 1164.0 | 855.0  |
| 4                     | 1013.0 | 754.0  | 927.0  | 855.0  |
| 5                     | 2351.0 | 1375.0 | 2155.0 | 1557.0 |
| 6                     | 1271.0 | 941.0  | 1164.0 | 1067.0 |
| 7                     | 1271.0 | 754.0  | 1164.0 | 855.0  |
| 8                     | 1539.0 | 754.0  | 1410.0 | 855.0  |
