# Supplementary material
Source: publisher figshare collection journal article supplement (https://f1000.figshare.com/articles/dataset/_/106723)

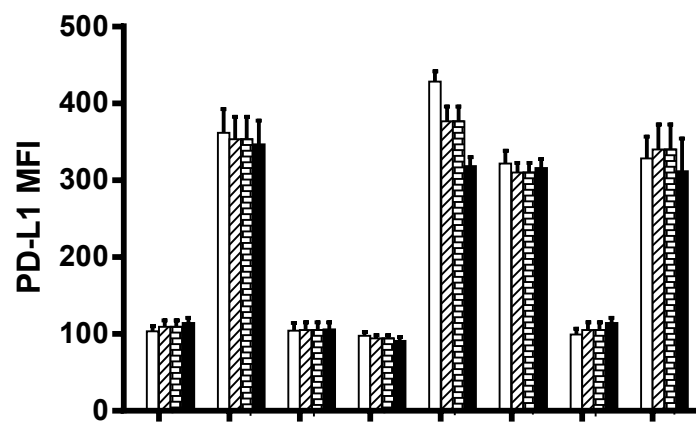

Supplement: Supplementary file 2 [file 1]

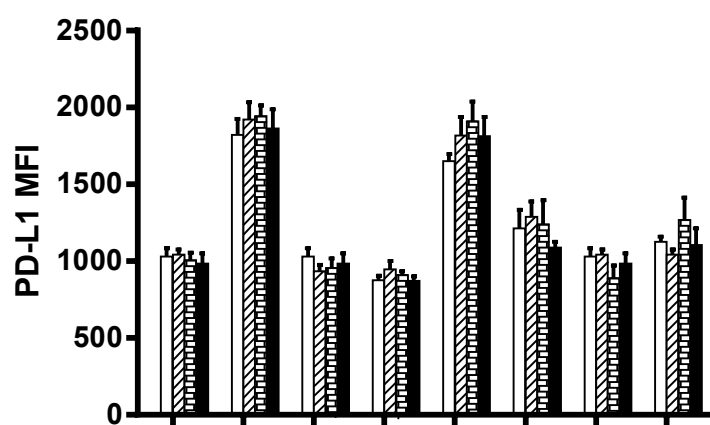

Supplement: Supplementary file 3 [file 1]

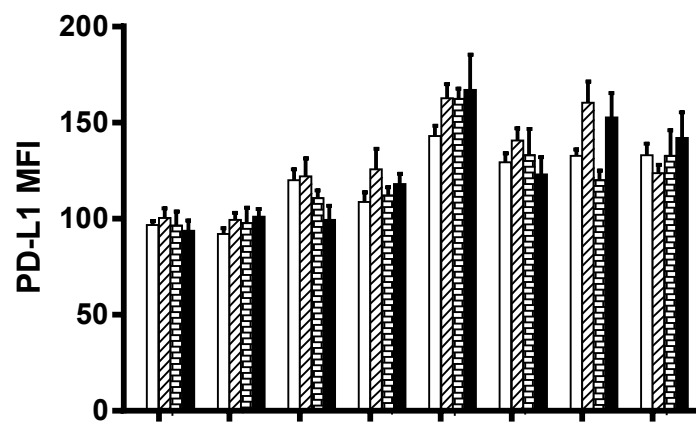

Supplement: Supplementary file 6 [file 1]

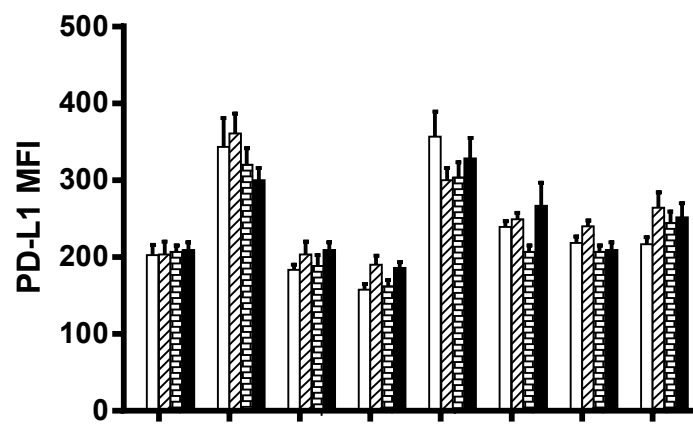

Supplement: Supplementary file 8 [file 1]
